# Supplementary material for: G3viz: an R package to interactively visualize genetic mutation data using a lollipop-diagram
Source: Oxford University Press journal article supplement (doi:10.1093/bioinformatics/btz631), 2019-08-07
Supplement: bioinformatics_36_3_928_s2.pdf [file bioinformatics_36_3_928_s2.pdf]

Supplementary Information for

## G3viz: an R package to interactively visualize genetic mutation data using a lollipop-diagram

**Table S1.** Default mapping table between *Mutation Type* (a.k.a., *Variant Classification*) to *Mutation Class* in g3viz

| Mutation_Type            | Mutation_Class | Short_Name               |
|--------------------------|----------------|--------------------------|
| <b>Inframe</b>           |                |                          |
| In_Frame_Del             | Inframe        | IF del                   |
| In_Frame_Ins             | Inframe        | IF ins                   |
| Silent                   | Inframe        | Silent                   |
| Targeted_Region          | Inframe        | IF                       |
| <b>Missense</b>          |                |                          |
| Missense_Mutation        | Missense       | Missense                 |
| <b>Truncating</b>        |                |                          |
| Frame_Shift              | Truncating     | FS                       |
| Frame_Shift_Del          | Truncating     | FS del                   |
| Frame_Shift_Ins          | Truncating     | FS ins                   |
| Nonsense_Mutation        | Truncating     | Nonsense                 |
| Nonstop_Mutation         | Truncating     | Nonstop                  |
| Splice_Region            | Truncating     | Splice                   |
| Splice_Site              | Truncating     | Splice                   |
| <b>Other</b>             |                |                          |
| 3'Flank                  | Other          | 3'Flank                  |
| 3'UTR                    | Other          | 3'UTR                    |
| 5'Flank                  | Other          | 5'Flank                  |
| 5'UTR                    | Other          | 5'UTR                    |
| De_novo_Start_InFrame    | Other          | de_novo_start_inframe    |
| De_novo_Start_OutOfFrame | Other          | de_novo_start_outofframe |
| Fusion                   | Other          | Fusion                   |
| IGR                      | Other          | IGR                      |
| Intron                   | Other          | Intron                   |
| lincRNA                  | Other          | lincRNA                  |
| RNA                      | Other          | RNA                      |
| Start_Codon_Del          | Other          | Nonstart                 |
| Start_Codon_Ins          | Other          | start_codon_ins          |
| Start_Codon_SNP          | Other          | Nonstart                 |
| Translation_Start_Site   | Other          | TSS                      |
| Unknown                  | Other          | Unknown                  |
